# Supplementary material for: Decreased mitochondrial D-loop region methylation mediates an increase in mitochondrial DNA copy number in CADASIL
Source: PubMed Central journal article supplement (PMC8725280; doi:10.1186/s13148-021-01225-z), 2022-01-04
Supplement: 13148_2021_1225_MOESM1_ESM.pdf [file 13148_2021_1225_MOESM1_ESM.pdf]

## **Supplemental Material**

### **Decreased mitochondrial D-loop region methylation mediates an increase in mitochondrial DNA copy number in CADASIL**

Jiewen Zhang, Junkui Shang, Fengyu Wang, Xuejing Huo, Ruihua Sun, Zhixia Ren,  
Wan Wang, MiaoMiao Yang, Gai Li, Dandan Gao, Ruijie Liu, Pingping Bai, Shuyi  
Wang, Yanliang Wang, Xi Yan

#### **Tables of Contents**

**Table S1.** The sequence of primer for mtDNAcn detection

**Table S2.** The associations between CADASIL and mtDNAcn in different adjusted models

**Table S3.** The associations between CADASIL and D-loop methylation levels in different adjusted models

**Table S4.** The associations between mtDNAcn and D-loop methylation levels in different adjusted models

**Table S1.** The sequence of primer for mtDNAcn detection

| <b>Name</b> | <b>Sequence (5'to3')</b>  |
|-------------|---------------------------|
| SERPINA1 F  | CAGTGAATAAATGAGGCGTACATCC |
| SERPINA1 R  | GACTGTTTCTCATGCCTCTGGAAAG |
| SLCO2B1 F   | CCTGATGCCTAGGTTTCTTTTCTTG |
| SLCO2B1 R   | GGTCATCTGCCTACCCTAGAAC    |
| MTND1 F     | TACGGGCTACTACAACCCTTC     |
| MTND1 R     | ATGGTAGATGTGGCGGGTTT      |
| MTND5 F     | CATTACTAACAACATTTCCCCCGC  |
| MTND5 R     | GGCTGTGAGTTTTAGGTAGAGGG   |

**Table S2.** The associations between CADASIL and mtDNAcn in different adjusted models

|         | mtDNAcn            |          |
|---------|--------------------|----------|
|         | $\beta(95\%CI)$    | <i>P</i> |
| Total   |                    |          |
| Model 1 | -1.49(-2.08,-0.89) | <0.001   |
| Model 2 | -1.45(-2.04,-0.85) | <0.001   |
| Model 3 | -1.45(-2.04,-0.85) | <0.001   |
| Model 4 | -1.48(-2.06,-0.90) | <0.001   |
| Model 5 | -1.48(-2.06,-0.90) | <0.001   |
| Model 6 | -1.46(-2.04,-0.87) | <0.001   |
| Male    |                    |          |
| Model 1 | -0.90(-1.61,-0.18) | 0.015    |
| Model 2 | -0.85(-1.57,-0.14) | 0.019    |
| Model 3 | -0.88(-1.60,-0.16) | 0.017    |
| Female  |                    |          |
| Model 1 | -2.72(-3.70,-1.74) | <0.001   |
| Model 2 | -2.70(-3.68,-1.72) | <0.001   |
| Model 3 | -2.86(-3.88,-1.84) | <0.001   |

Model 1: adjust for age

Model 2: adjust for hypertension, diabetes mellitus, dyslipidemia

Model 3: adjust for age, hypertension, diabetes mellitus, dyslipidemia

Model 4: adjust for gender

Model 5: adjust for age, gender

Model 6: adjust for hypertension, diabetes mellitus, dyslipidemia

**Table S3.** The associations between CADASIL and D-loop methylation levels in different adjusted models

|         | D-loop methylation (%) |          |
|---------|------------------------|----------|
|         | $\beta(95\%CI)$        | <i>P</i> |
| Total   |                        |          |
| Model 1 | 38.44(31.48,45.39)     | <0.001   |
| Model 2 | 38.63(31.68,45.58)     | <0.001   |
| Model 3 | 38.61(31.66,45.57)     | <0.001   |
| Model 4 | 38.55(31.70,45.40)     | <0.001   |
| Model 5 | 38.57(31.73,45.41)     | <0.001   |
| Model 6 | 38.55(31.69,45.41)     | <0.001   |
| Male    |                        |          |
| Model 1 | 33.92(25.20,42.63)     | <0.001   |
| Model 2 | 34.39(25.90,42.88)     | <0.001   |
| Model 3 | 34.41(25.80,43.02)     | <0.001   |
| Female  |                        |          |
| Model 1 | 48.83(37.45,60.21)     | <0.001   |
| Model 2 | 46.44(35.09,57.78)     | <0.001   |
| Model 3 | 48.47(36.65,60.29)     | <0.001   |

Model 1: adjust for age

Model 2: adjust for hypertension, diabetes mellitus, dyslipidemia

Model 3: adjust for age, hypertension, diabetes mellitus, dyslipidemia

Model 4: adjust for gender

Model 5: adjust for age, gender

Model 6: adjust for gender, hypertension, diabetes mellitus, dyslipidemia

**Table S4.** The associations between mtDNAcn and D-loop methylation levels in different adjusted models

|         | mtDNAcn             |          |
|---------|---------------------|----------|
|         | $\beta(95\%CI)$     | <i>P</i> |
| Total   |                     |          |
| Model 1 | -5.21(-7.30,-3.13)  | <0.001   |
| Model 2 | -5.24(-7.31,-3.17)  | <0.001   |
| Model 3 | -5.25(-7.32,-3.18)  | <0.001   |
| Model 4 | -5.72(-7.79,-3.65)  | <0.001   |
| Model 5 | -5.77(-7.84,-3.70)  | <0.001   |
| Model 6 | -5.72(-7.78,-3.67)  | <0.001   |
| Male    |                     |          |
| Model 1 | -4.25(-6.99,-1.50)  | 0.002    |
| Model 2 | -4.31(-7.04,-1.58)  | 0.002    |
| Model 3 | -4.32(-7.04,-1.60)  | 0.002    |
| Female  |                     |          |
| Model 1 | -7.64(-10.69,-4.58) | <0.001   |
| Model 2 | -7.74(-10.66,-4.83) | <0.001   |
| Model 3 | -7.65(-10.56,-4.74) | <0.001   |

Model 1: adjust for age;

Model 2: adjust for hypertension, diabetes mellitus, dyslipidemia;

Model 3: adjust for age, hypertension, diabetes mellitus, dyslipidemia;

Model 4: adjust for gender;

Model 5: adjust for age, gender;

Model 6: adjust for gender, hypertension, diabetes mellitus, dyslipidemia.
